# Supplementary material for: Capivasertib, an AKT Kinase Inhibitor, as Monotherapy or in Combination with Fulvestrant in Patients with AKT1 E17K-Mutant, ER-Positive Metastatic Breast Cancer
Source: Oxford University Press journal article supplement (doi:10.1158/1078-0432.ccr-19-3953), 2020-04-20
Supplement: 10780432ccr193953-sup-233401_2_supp_6216549_q8h3gs.pdf [file 10780432ccr193953-sup-233401_2_supp_6216549_q8h3gs.pdf]

## Supplementary Figure 2. PFS Association With $\geq 50\%$ Decrease from Baseline in $AKT1^{E17K}$ at Cycle 2 Day 1 in ctDNA

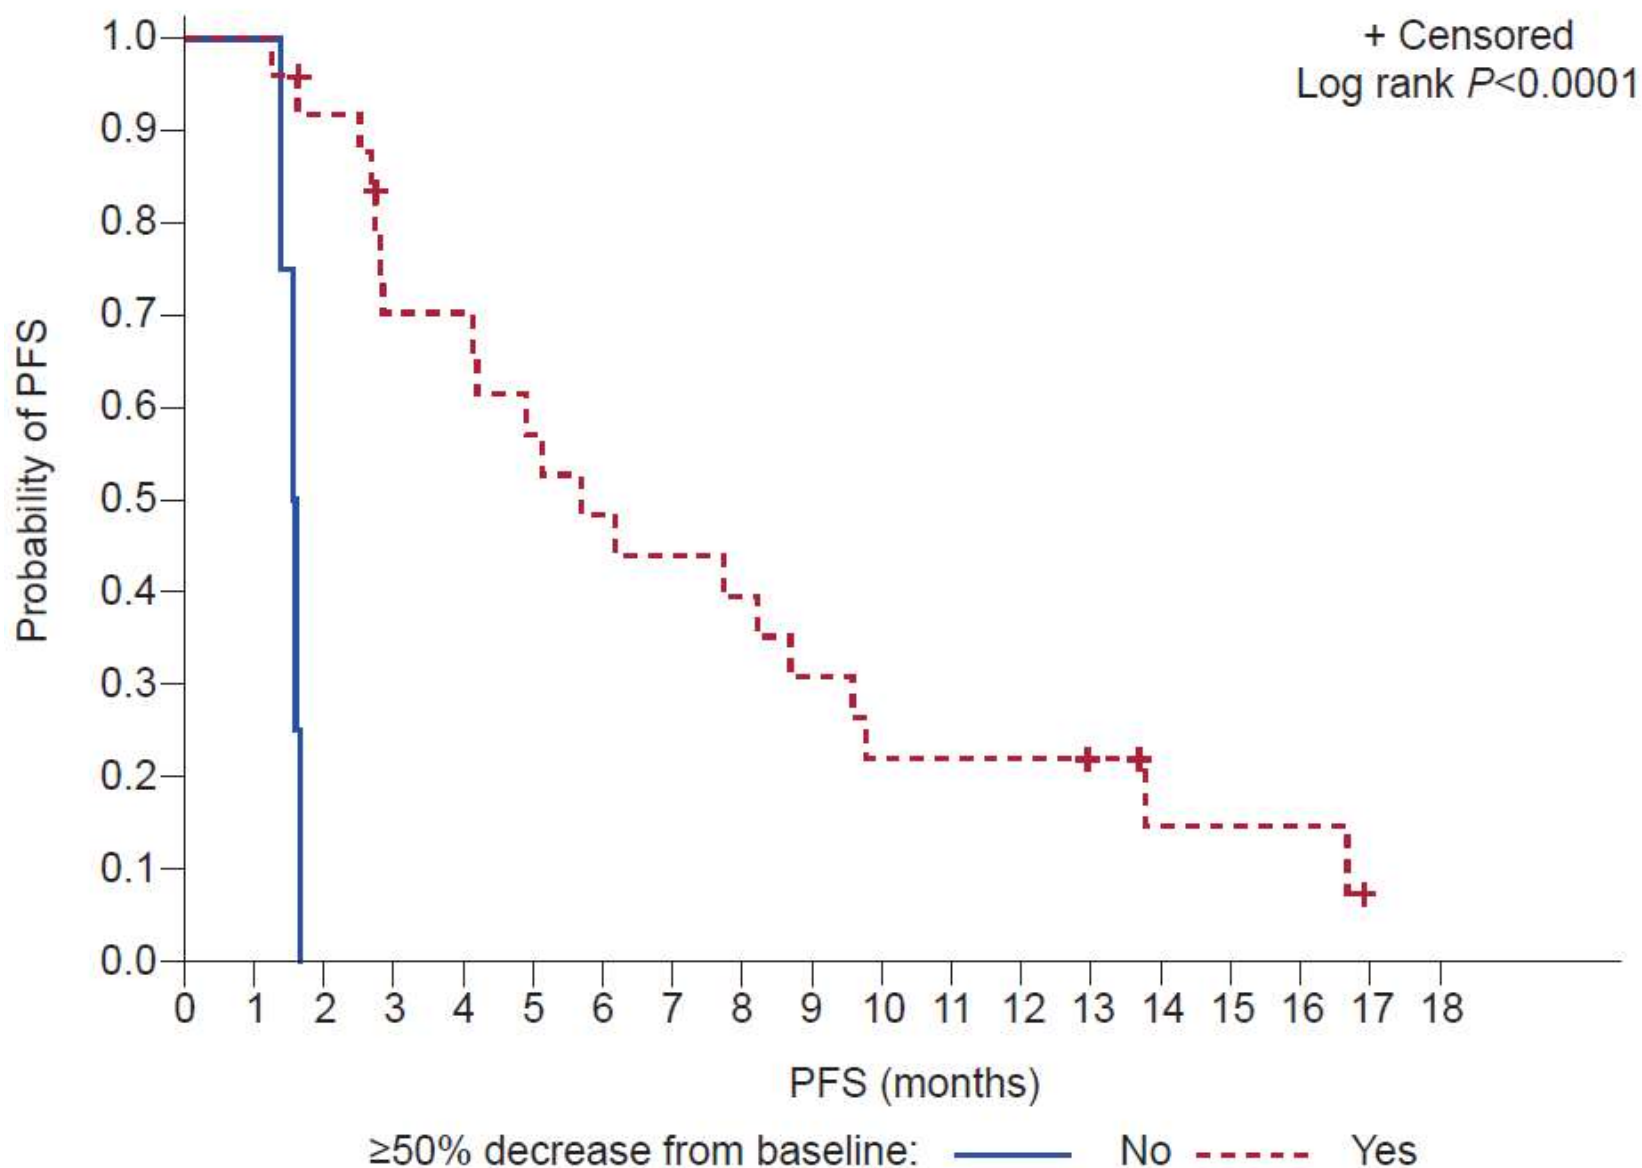

A  $\geq 50\%$  decrease in circulating  $AKT1^{E17K}$  at cycle 2 day 1 compared with baseline (cycle 1 day 1), as measured by ddPCR, was associated with improved PFS on treatment. ctDNA, circulating tumor DNA; ddPCR, droplet digital polymerase chain reaction; PFS, progression-free survival.
